# Supplementary material for: Characterisation of heterogeneous molybdate and chromate phase assemblages in model nuclear waste glasses by multinuclear magnetic resonance spectroscopy
Source: Royal Society of Chemistry journal article supplement (doi:10.1039/c2cp40764g), 2012-01-01
Supplement: c2cp40764g.pdf [file c2cp40764g.pdf]

Supplementary Material for:

***Characterisation of heterogeneous molybdate and chromate phase assemblages in  
model nuclear waste glasses by multinuclear magnetic resonance spectroscopy***

Brandon J. Greer, and Scott Kroeker<sup>\*</sup>

Department of Chemistry, University of Manitoba, Winnipeg, Manitoba, Canada R3T 2N2

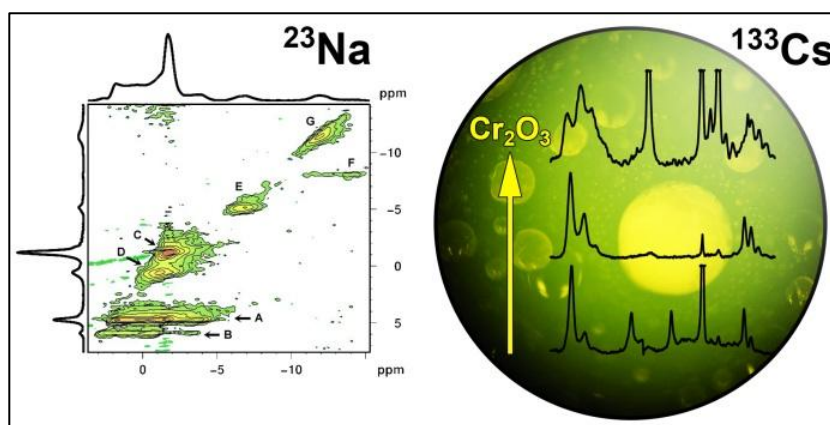

\* Corresponding Author

Dr. Scott Kroeker

Department of Chemistry

University of Manitoba

Winnipeg, Manitoba

Canada R3T 2N2

Tel: (204) 474-9335

Email: [Scott\\_Kroeker@umanitoba.ca](mailto:Scott_Kroeker@umanitoba.ca)

Predicting Yellow Phase Composition by EMPA

The mol% composition determined by EMPA can be normalised to SiO<sub>2</sub> to show how the quantity of components that are present in both glassy and crystalline phases (i.e., Na<sub>2</sub>O, MoO<sub>3</sub>, Cs<sub>2</sub>O, Cr<sub>2</sub>O<sub>3</sub>) have changed (compared to the nominal composition) upon heating. Table S1 shows a comparison between the nominal and EMPA (SiO<sub>2</sub>-normalised) values, and how their difference can be used to obtain an estimate of yellow phase composition that is comparable to that determined through the direct measurement.

**Table S1.** Calculation of YP4 Composition Based on its Parent Glass (Cr-4)

|                                           | B <sub>2</sub> O <sub>3</sub> | Na <sub>2</sub> O | MoO <sub>3</sub> | Cs <sub>2</sub> O | Cr <sub>2</sub> O <sub>3</sub> | SiO <sub>2</sub> | Sum  |
|-------------------------------------------|-------------------------------|-------------------|------------------|-------------------|--------------------------------|------------------|------|
| <b>Cr-4</b> Nominal                       | 17.26                         | 15.50             | 2.56             | 3.71              | 0.52                           | 60.44            | 100  |
| <b>Cr-4</b> EMPA (normSiO2)               | 17.92                         | 14.21             | 0.60             | 2.31              | 0.32                           | 60.44            | 95.8 |
| <b>Difference</b> <sup>a</sup>            | (-0.65)                       | 1.29              | 1.96             | 1.40              | 0.20                           | 0.00             | 4.2  |
|                                           |                               | ↓                 | ↓                | ↓                 | ↓                              |                  |      |
| <b>YP4</b> calc <sup>b</sup>              | -                             | 26.63             | 40.30            | 28.86             | 4.20                           | -                | 100  |
| <b>YP4</b> calc (25% Cs vol) <sup>c</sup> | -                             | <b>32.92</b>      | <b>49.82</b>     | <b>12.06</b>      | <b>5.19</b>                    | -                | 100  |
|                                           |                               | ± 0.72            | ± 4.98           | ± 0.31            | ± 0.97                         |                  |      |
| <b>YP4</b> EMPA                           | -                             | <b>38.88</b>      | <b>44.99</b>     | <b>11.34</b>      | <b>4.79</b>                    | -                | 100  |
|                                           |                               | ± 4.84            | ± 2.16           | ± 4.11            | ± 0.99                         |                  |      |

**a:** “Difference” = “Cr-4<sub>Nominal</sub>” – “Cr-4<sub>EMPA (normSiO2)</sub>”.

**b:** “YP4<sub>calc</sub>” = Values from the “Difference” composition normalised to 100%, excluding B<sub>2</sub>O<sub>3</sub>.

**c:** 25% Cs<sub>2</sub>O volatilisation was applied to nominal value, and a new difference was taken and normalised.

### Statistics of Chromium Substitution – Three-Cation Model

The expected intensity (as a percentage) for each Cs site in  $\text{Cs}_3\text{NaMo}_2\text{O}_8$  is given according to the product of the combinations (“ $n$  choose  $r$ ”) of the corresponding probabilities of occurrence for Mo and Cr atoms. For a three-cation model, the distribution is given by the general formula:

$$p(3 - y\text{Mo}, y\text{Cr}) = \binom{n}{r} (p(\text{Mo}))^{3-y} (p(\text{Cr}))^y, \text{ where } y = 0, 1, 2, \text{ or } 3 \text{ Cr atoms} \quad (1)$$

$$\text{and } {}_nC_r = n!/(r!(n-r)!), \text{ } n = \text{number of atoms, } r = \text{positions taken by Cr} \quad (2)$$

In equation 1, the quantities  $p(\text{Mo})$  and  $p(\text{Cr})$  refer to the probabilities of encountering a molybdenum or chromium atom, respectively.. If the crystalline phase is defined by  $\text{Cs}_3\text{Na}(\text{Mo}_{1-x}\text{Cr}_x\text{O}_4)_2$ , Eq. (1) can be written as:

$$p(3 - y\text{Mo}, y\text{Cr}) = \binom{n}{r} (1 - x)^{3-y} (x)^y \quad (3)$$

It should be noted that this model assumes a completely random substitution, and that Cs sites (1) and (2) behave similarly and have equal second-sphere occupancy. The four-cation model follows similar notation, however using ‘4- $y$ ’ and ‘ $y$ ’ as coefficients.

### Other Supplementary Figures and Tables

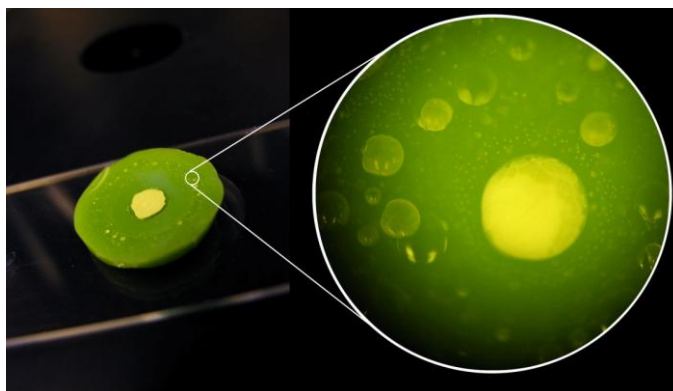

**Figure S1.** Glass Cr-3 showing a large collection of yellow phase congregated in the center. The crystalline phase (YP3) was separated by hand. The glassy regions are green while the crystal phase is yellow in colour, suggesting the presence of  $\text{Cr}^{3+}$  in the glass and  $\text{Cr}^{6+}$  in the crystalline portions.

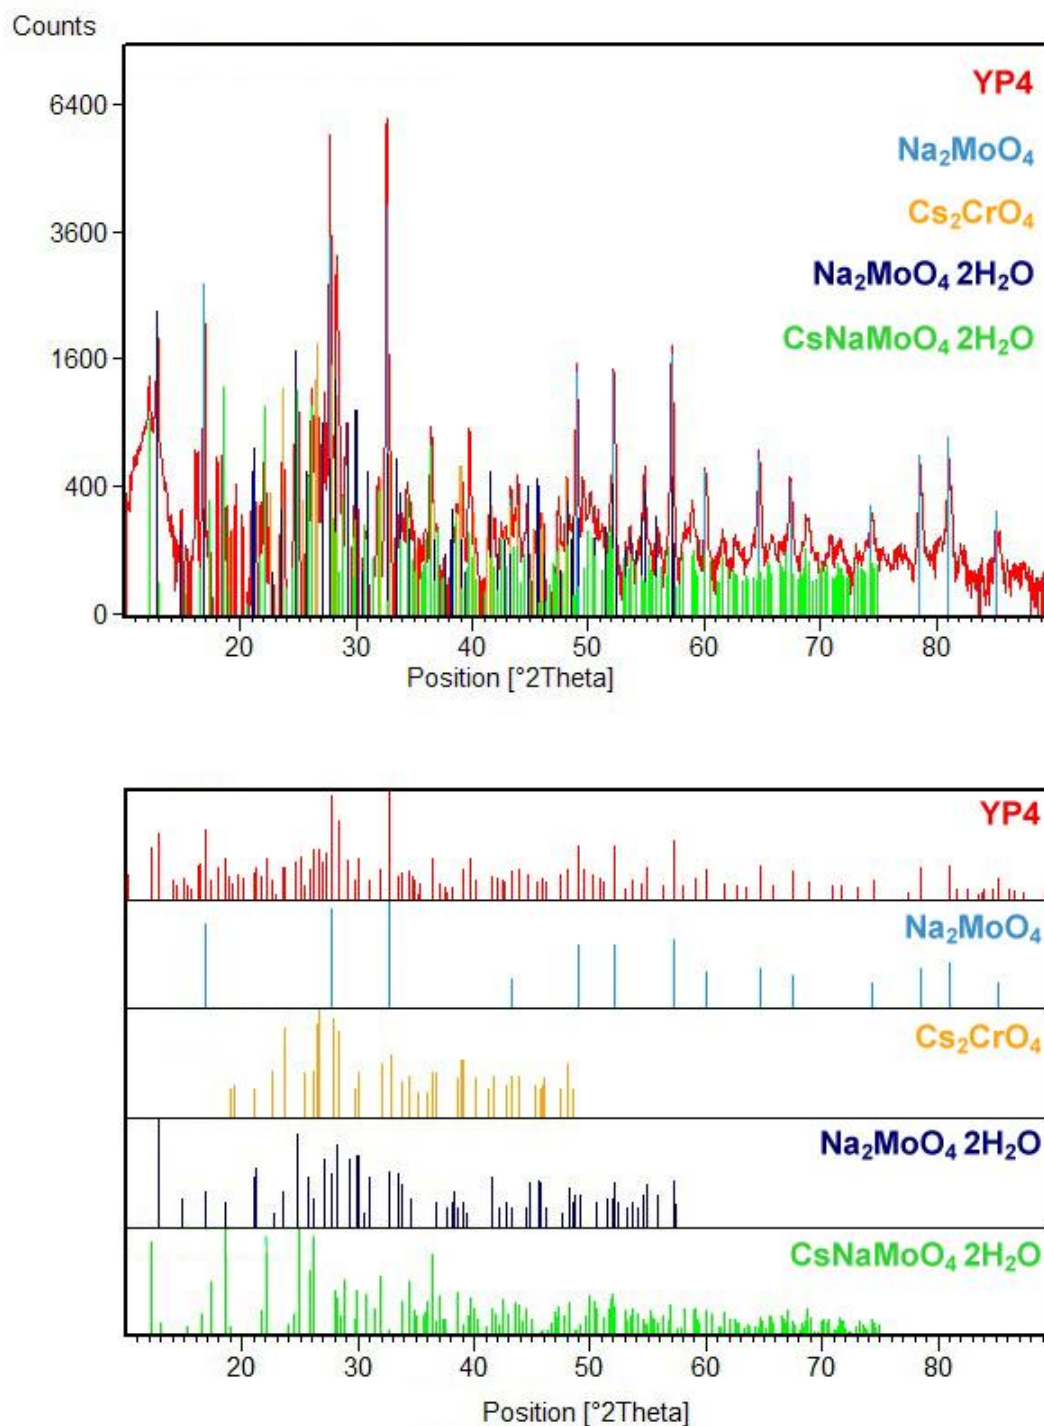

**Figure S2.** Powder x-ray diffraction pattern (upper) and peak pattern (lower) of the crystalline composite YP4, with database matches confirming the presence of Na<sub>2</sub>MoO<sub>4</sub>, Cs<sub>2</sub>CrO<sub>4</sub>, Na<sub>2</sub>MoO<sub>4</sub>·2H<sub>2</sub>O, and CsNaMoO<sub>4</sub>·2H<sub>2</sub>O.

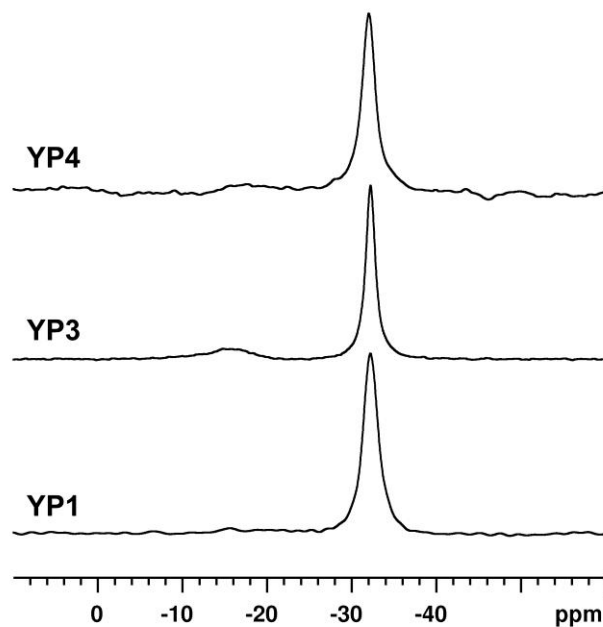

**Figure S3.**  $^{95}\text{Mo}$  MAS NMR of crystalline yellow phase samples at 14.1 T. The spectral patterns of  $\text{Na}_2\text{MoO}_4$  and  $\text{CsNaMoO}_4 \cdot 2\text{H}_2\text{O}$  overlap at 33 ppm, while  $\text{Cs}_3\text{NaMo}_2\text{O}_8$  appears at -15 ppm.

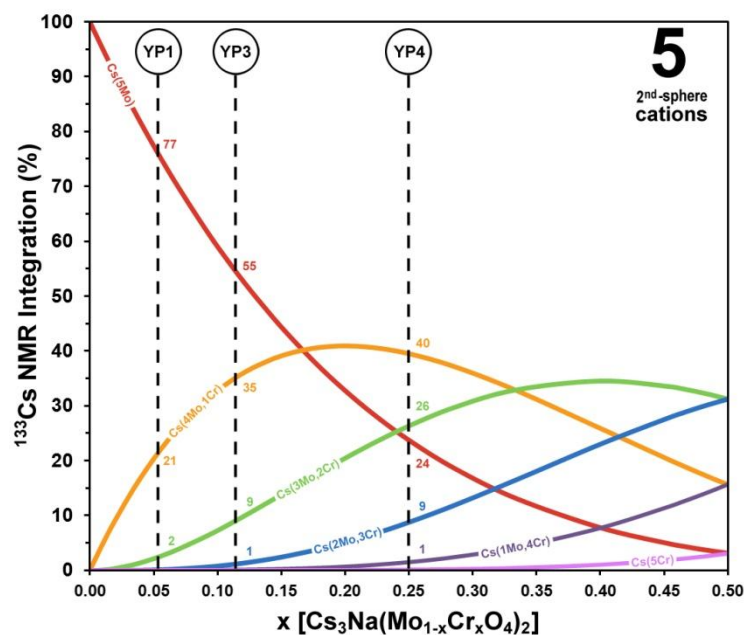

**Figure S4.** Theoretical  $^{133}\text{Cs}$  NMR integration of the  $\text{Cs}_3\text{NaMo}_2\text{O}_8$  site as a function of chromium substitution assuming cesium surrounded by five cations. Each line represents a particular substitution, with the local cations indicated in brackets. In the notation introduced by the  $^{133}\text{Cs}$  NMR spectra: 0 (red), 1 (orange), 2 (green), 3 (blue), and the final peaks: 4 (purple) and 5 (pink) were not observed in our NMR. The dashed lines indicate the best theoretical match for the experimental  $^{133}\text{Cs}$  NMR data of YP1, YP3, and YP4. Under this model, the phase compositions are:  $\text{Cs}_3\text{Na}(\text{Mo}_{1.95}\text{Cr}_{0.05})\text{O}_8$  (YP1),  $\text{Cs}_3\text{Na}(\text{Mo}_{0.88}\text{Cr}_{0.12})\text{O}_8$  (YP3), and  $\text{Cs}_3\text{Na}(\text{Mo}_{0.75}\text{Cr}_{0.25})\text{O}_8$  (YP4).

**Table S2.** <sup>23</sup>Na NMR Parameters and Integrations of YP1 and YP3

| Site                                                 | Label in<br>MQMAS | C <sub>Q</sub><br>(MHz) | η    | δ <sub>iso</sub><br>(ppm) | YP1                        | YP3                        |                            | ref              |
|------------------------------------------------------|-------------------|-------------------------|------|---------------------------|----------------------------|----------------------------|----------------------------|------------------|
|                                                      |                   |                         |      |                           | Integration,<br>14.1 T (%) | Integration,<br>14.1 T (%) | Integration,<br>21.1 T (%) |                  |
| <b>Na<sub>2</sub>MoO<sub>4</sub></b>                 | A                 | 2.59                    | 0    | 3.2                       | 86                         | 85                         | 77                         | Skibsted<br>1994 |
| <b>Na<sub>2</sub>MoO<sub>4</sub>·2H<sub>2</sub>O</b> |                   |                         |      |                           |                            |                            |                            |                  |
| Na(1)                                                | B                 | 0.875                   | 0.23 | -1.4                      | -                          | -                          | -                          | Skibsted<br>1994 |
| Na(2)                                                | C                 | 2.69                    | 0.09 | 4.0                       | -                          | -                          | -                          |                  |
| <b>CsNaMoO<sub>4</sub>·2H<sub>2</sub>O</b>           | D                 | 1.33                    | 1    | -0.4                      | 9                          | -                          | 11                         | Kroeker<br>2010  |
| <b>Unknown 1</b>                                     | E                 | 1.0                     | 1    | -6.0                      | -                          | 5                          | 4                          | this work        |
| <b>Unknown 2</b>                                     | F                 | 2.6                     | 0    | -9.5                      | 2                          | 6                          | 5                          | this work        |
| <b>Cs<sub>3</sub>NaMo<sub>2</sub>O<sub>8</sub></b>   | G                 | 0.7                     | 1    | -11.8                     | 3                          | 4                          | 3                          | Kroeker<br>2010  |
